# Supplementary material for: The impacts of pollution sources and temperature on the light absorption of HULIS were revealed by UHPLC-HRMS/MS at the molecular structure level
Source: Copernicus journal article supplement (doi:10.5194/egusphere-2025-1808), 2025-04-25
Supplement: Supplementary file [file egusphere-2025-1808-AC1-supplement.pdf]

### ***Response to reviewer #3***

Thanks to the reviewer for your careful reading and your constructive comments and suggestions on our manuscript. The reviewer's comments and suggestions are shown as *italicized font*, our response to the comments is normal font. New or modified text is in normal font and in blue. Details are as follows.

#### **Reviewer's comments:**

Reviewer #3: *This work investigates the molecular compositions and light absorption of HULIS in cold environments. The data is informative and interesting. However, some statements need more evidence and detailed in the main text. The following comments need to be addressed before publication.*

#### **[Response]**

Thanks for the reviewer's comments on this manuscript. Please check our point-by-point response and the modified text in the manuscript.

(1) *Introduction: There have been many studies on revealing the molecular-level characteristics and compositions as well as the relation to HULIS light absorption. I may suggest the author review the literature on the HULIS molecular compositions in the introduction section. This would be helpful to gain a deeper understanding on the findings in this work.*

#### **[Response]**

Thank you for your valuable suggestion regarding the need to strengthen the introduction by reviewing literature on HULIS molecular compositions and their link to light absorption. In response, we have significantly expanded the introduction to incorporate critical advances in molecular-level characterization of HULIS light-absorption mechanisms. The revised text now explicitly acknowledges that nitroaromatic compounds and oxygenated polycyclic aromatics serve as critical chromophores governing HULIS light absorption (Kuang et al., 2023; Qin et al., 2022; Song et al., 2019; Zou et al., 2023). This enhancement bridges the gap between bulk compositional studies and functional optical properties, establishing essential context for our investigation into temperature-driven molecular evolution. By anchoring our research within this refined framework, we more effectively foreground the novelty of our work: resolving how atmospheric aging processes under cold conditions alter these molecular structures and their associated absorption behavior—a knowledge gap previously obscured by insufficient molecular mechanistic understanding.

#### **[Revised]**

Line 40-51: As reactive components in the atmosphere, HULIS exhibit pronounced chemical activity through their oxygenated functional groups, particularly prone to the oxidation by reactive oxygen radicals and gaseous oxidants (Hems et al., 2021; Huo et al., 2021; Qiu et al., 2024). Both

laboratory simulations and field observations have demonstrated that these atmospheric aging processes significantly alter the light-absorption properties and environmental behaviors of HULIS (Hems and Abbatt, 2018; Qiu et al., 2024; Wang et al., 2022, 2019). Furthermore, significant efforts have been directed towards understanding the link between molecular composition and light absorption of HULIS. Studies have suggested that chromophores like nitroaromatics and oxygenated polycyclic aromatics are key contributors to the light absorption of HULIS (Kuang et al., 2023; Qin et al., 2022; Song et al., 2019; Zou et al., 2023). However, critical knowledge gaps persist regarding the molecular structures that dominate light absorption and, importantly how these molecules and their associated absorption properties evolve during atmospheric aging processes. This limits comprehension understanding of the atmospheric evolution process and radiative effect of HULIS.

(2) *Some important information in the experiment section is omitted. I strongly suggest moving some important information from the supplementary to the main text, especially for the molecular composition analysis of HULIS and the quantification of specific compounds. At least some of the key information should be briefly introduced in this section.*

#### [Response]

We sincerely thank the reviewer for emphasizing the importance of methodological transparency in molecular composition analysis. In direct response, we have significantly enhanced Section 2.2 by migrating critical methodological details from the supplementary materials to the main text. These additions comprehensively address three core aspects of our analytical workflow:

Firstly, we now explicitly describe the molecular formula derivation protocol within the main text, including atomic constraints ( $C_{1-40}H_{1-100}O_{0-40}N_{0-6}S_{0-2}$ ), elemental ratio limits ( $0.3 \leq H/C \leq 3.0$ ,  $0 \leq O/C \leq 1.2$ ,  $0 \leq N/C \leq 1.0$ , and  $0 \leq S/C \leq 0.8$ ), mass tolerance ( $\pm 5$  ppm), and signal-to-noise threshold ( $> 3$ ). Secondly, the structural identification confidence framework (Schymanski levels CL1-CL3) and spectral matching databases (mzCloud, ChemSpider, CFM-ID) are introduced to establish our annotation rigor. Thirdly, comprehensive description of our semi-quantitative strategy using structurally analogous surrogate standards (e.g., 4-methyl-5-nitrocatechol for the quantification of nitrocatechol derivatives), explicitly noting inherent uncertainties (**Text S2**) from ionization efficiency variations. These modifications provide a complete analytical foundation for interpreting the molecular-level findings presented in Sections 3.

#### [Revised]

Line 100-116: The obtained data analysis was performed with the Compound Discoverer 3.3 software to generate reasonable molecular formulas and match fine structures to MS/MS data. The numbers of atoms restriction of formula were 1-40 for C, 1-100 for H, 0-40 for O, 0-6 for N, and 0-2 for S. The formulas were also constrained by setting  $0.3 \leq H/C \leq 3.0$ ,  $0 \leq O/C \leq 1.2$ ,  $0 \leq N/C \leq 1.0$ , and  $0 \leq S/C \leq 0.8$ . (Kind and Fiehn, 2007) All of the mathematically formulas for each peak were performed with a mass tolerance of  $\pm 5$  ppm and peak areas more than three times of the blank sample. Three curated spectral databases, mzcloud library database, ChemSpider library database, and CFM-ID

(<https://cfmid.wishartlab.com>) were applied to screen suspect candidates of structure (Allen et al., 2015). According to the Schymanski's confidence level (CL), these candidates were divided into confirmed structures (CL1), probable structures (CL2), and tentative candidates (CL3) (Schymanski et al., 2014). We showed two examples to illustrate the derivation processes of candidates in **Figure S11**.

A semi-quantitative strategy was conducted as follows: target analytes were quantified using external standard solutions of structurally analogous surrogate compounds (Nguyen et al., 2014a; Nozière et al., 2015). A representative application involved utilizing the standard curve of 4-methyl-5-nitrocatechol to simultaneously quantify three structural analogs: 4-methyl-5-nitrocatechol, 3-methyl-5-nitrocatechol, and 3,4-dimethyl-5-nitrocatechol. While this strategy enables quantification of compounds without commercially available standards, it introduces inherent uncertainties due to ionization efficiency variations between surrogates and target analytes (discussed in **Text S2**).

#### **Text S2. Discussion on the uncertainty of semi-quantitative strategy**

In atmospheric chemistry, the components of organic aerosols are always complex and no authentic standards can be used for quantification. In the analysis of these components, it has been widely suggested to use available proxy compounds for quantification (Ma et al., 2022; Nozière et al., 2015). For example, camphor-10-sulfonic acid is often used as surrogate standard for the quantification of  $\alpha$ -pinene derivative organosulfates (Ma et al., 2022; Nguyen et al., 2014b). This strategy can achieve the quantitative analysis of various compounds in organic aerosols, but there are inevitable uncertainties which mainly come from the ionization efficiency difference between non-authentic standards and target analytes in mass spectrometric analysis (Nozière et al., 2015). Generally, the closer the molecular structures of surrogate standard is to the target analyte, the smaller the difference in ionization efficiency, resulting in the similar signal intensities in mass spectrometry.

**Table S4** lists the deviation observed when different compounds were used as surrogate standards for quantification of each standard in this study. For instance, nitrophenol derivatives (4NP, 2N135T, and 4M5NC) showed quantification errors within 130% when used as surrogate standards for 26D4NP. Tetrahydroquinoline (1234THQ), an N-heterocyclic aromatic hydrocarbon, exhibited an error below 110% when quantifying 1tBI. However, even structurally similar surrogate standards may introduce an error of a factor over 2. Both P3C and I2C belong to N-heterocyclic aromatic aldehydes, yet using I2C as a surrogate for P3C resulted in a 46% error. When the structurally distinct PAAE was used as a surrogate for P3C, the error reached 600%. Therefore, when adopting semi-quantitative strategies, it is critical to first identify the chemical structure of the target analyte and subsequently select surrogate standards with analogous structural features for quantification.

Table S4. The deviations observed when different compounds were used as surrogate standards for quantifying each target analyte

| Deviation % | E2OCA  | ES    | SA    | F25DC | VAN    | 18NaPA | 9FLU  | 910PheQ | 2AF   | 2FA   | 1234THQ | 1tBI   | 4NP    |
|-------------|--------|-------|-------|-------|--------|--------|-------|---------|-------|-------|---------|--------|--------|
| E2OCA       | 100.0  | 4.3   | 8.8   | 17.6  | 101.9  | 64.2   | 9.5   | 324.7   | 21.7  | 2.5   | 163.1   | 155.8  | 93.5   |
| ES          | 2400.0 | 100.0 | 207.6 | 421.0 | 2446.7 | 1539.0 | 224.3 | 7799.2  | 519.1 | 57.3  | 3916.1  | 3741.7 | 3014.4 |
| SA          | 1164.8 | 47.8  | 100.0 | 203.7 | 1187.5 | 746.6  | 108.1 | 3787.0  | 251.3 | 27.0  | 1901.1  | 1816.4 | 1018.5 |
| F25DC       | 570.7  | 23.7  | 49.2  | 100.0 | 581.8  | 365.9  | 53.2  | 1854.7  | 123.3 | 13.5  | 931.2   | 889.7  | 625.2  |
| VAN         | 98.1   | 4.8   | 9.1   | 17.8  | 100.0  | 63.2   | 9.8   | 317.2   | 21.8  | 3.0   | 159.6   | 152.6  | 125.5  |
| 18NaPA      | 155.5  | 7.3   | 14.2  | 27.9  | 158.5  | 100.0  | 15.3  | 503.5   | 34.3  | 4.5   | 253.2   | 242.0  | 51.2   |
| 9FLU        | 1079.1 | 44.1  | 92.5  | 188.5 | 1100.1 | 691.6  | 100.0 | 3508.8  | 232.7 | 24.9  | 1761.4  | 1682.8 | 785.6  |
| 910PheQ     | 30.3   | 0.6   | 2.0   | 4.7   | 30.9   | 19.2   | 2.2   | 100.0   | 6.0   | 0.1   | 49.9    | 47.6   | 28.5   |
| 2AF         | 463.1  | 19.1  | 39.9  | 81.1  | 472.1  | 296.9  | 43.1  | 1505.4  | 100.0 | 10.9  | 755.8   | 722.1  | 409.9  |
| 2FA         | 4219.8 | 175.1 | 364.2 | 739.6 | 4301.9 | 2705.6 | 393.7 | 13714.5 | 912.1 | 100.0 | 6885.9  | 6579.1 | 4191.0 |
| 1234THQ     | 61.2   | 2.2   | 5.0   | 10.5  | 62.4   | 39.1   | 5.4   | 199.5   | 13.0  | 1.1   | 100.0   | 95.5   | 60.7   |
| 1tBI        | 64.0   | 2.3   | 5.2   | 10.9  | 65.3   | 40.9   | 5.6   | 208.9   | 13.5  | 1.2   | 104.7   | 100.0  | 60.9   |
| 4NP         | 106.9  | 3.3   | 9.8   | 16.0  | 79.7   | 195.5  | 12.7  | 351.1   | 24.4  | 2.4   | 164.7   | 164.2  | 100.0  |
| 2N135T      | 103.7  | 3.2   | 9.5   | 15.5  | 77.3   | 186.1  | 12.3  | 339.9   | 23.7  | 2.3   | 159.6   | 159.1  | 97.0   |
| 26D4NP      | 91.1   | 3.8   | 7.9   | 16.0  | 92.9   | 58.4   | 8.5   | 296.1   | 19.7  | 2.2   | 148.7   | 142.1  | 86.3   |
| 4M5NC       | 110.6  | 4.4   | 9.4   | 19.3  | 112.7  | 70.9   | 10.2  | 359.8   | 23.8  | 2.5   | 180.6   | 172.5  | 123.6  |
| 4NA         | 131.5  | 5.5   | 11.4  | 23.1  | 134.1  | 84.3   | 12.3  | 427.5   | 28.4  | 3.1   | 214.6   | 205.1  | 184.7  |
| 3NSA        | 2423.3 | 100.5 | 209.1 | 424.7 | 2470.4 | 1553.7 | 226.0 | 7875.9  | 523.8 | 57.4  | 3954.4  | 3778.2 | 5453.1 |
| P3C         | 91.3   | 4.0   | 8.1   | 16.2  | 93.0   | 58.6   | 8.7   | 296.1   | 19.9  | 2.4   | 148.8   | 142.2  | 92.6   |
| I2C         | 200.5  | 8.3   | 17.3  | 35.1  | 204.4  | 128.5  | 18.7  | 651.6   | 43.3  | 4.7   | 327.1   | 312.6  | 209.9  |
| 3PAAE       | 15.4   | 0.8   | 1.4   | 2.8   | 15.7   | 9.9    | 1.5   | 49.6    | 3.4   | 0.5   | 25.0    | 23.9   | 14.1   |
| 2AP         | 132.3  | 5.5   | 11.4  | 23.2  | 134.9  | 84.8   | 12.3  | 430.1   | 28.6  | 3.1   | 215.9   | 206.3  | 210.9  |
| 4MSPAA      | 139.6  | 6.0   | 12.3  | 24.7  | 142.3  | 89.6   | 13.3  | 453.2   | 30.4  | 3.6   | 227.7   | 217.6  | 163.9  |
| 4A5M2MBSA   | 1347.0 | 55.3  | 115.7 | 235.6 | 1373.2 | 863.5  | 125.1 | 4379.3  | 290.7 | 31.3  | 2198.5  | 2100.5 | 1400.9 |
| 3M4P1SA     | 763.1  | 31.3  | 65.5  | 133.4 | 778.0  | 489.1  | 70.8  | 2481.0  | 164.6 | 17.7  | 1245.5  | 1190.0 | 1021.1 |

|             | Continue |        |        |        |       |        |        |         |        |        |           |         |
|-------------|----------|--------|--------|--------|-------|--------|--------|---------|--------|--------|-----------|---------|
| Deviation % | 2N135T   | 26D4NP | 4M5NC  | 4NA    | 3NSA  | P3C    | I2C    | 3PAAE   | 2AP    | 4MSPAA | 4A5M2MBSA | 3M4P1SA |
| E2OCA       | 96.4     | 109.7  | 90.4   | 76.1   | 4.3   | 109.6  | 50.0   | 654.7   | 75.6   | 71.6   | 7.6       | 13.3    |
| ES          | 3108.7   | 2634.1 | 2170.5 | 1824.8 | 99.5  | 2630.1 | 1197.5 | 15728.3 | 1814.0 | 1717.7 | 179.6     | 315.9   |
| SA          | 1050.7   | 1278.5 | 1053.3 | 885.5  | 47.5  | 1276.6 | 580.8  | 7637.8  | 880.2  | 833.4  | 86.4      | 152.6   |
| F25DC       | 644.8    | 626.3  | 516.1  | 433.9  | 23.5  | 625.4  | 284.7  | 3740.5  | 431.3  | 408.4  | 42.6      | 75.0    |
| VAN         | 129.4    | 107.6  | 88.8   | 74.8   | 4.7   | 107.4  | 49.3   | 639.0   | 74.3   | 70.4   | 8.0       | 13.5    |
| 18NaPA      | 53.7     | 170.6  | 140.7  | 118.4  | 7.2   | 170.3  | 78.0   | 1014.6  | 117.7  | 111.5  | 12.4      | 21.2    |
| 9FLU        | 810.2    | 1184.4 | 975.8  | 820.3  | 43.8  | 1182.7 | 537.9  | 7076.9  | 815.4  | 772.0  | 79.9      | 141.2   |
| 910PheQ     | 29.4     | 33.3   | 27.3   | 22.9   | 0.6   | 33.3   | 14.8   | 202.4   | 22.7   | 21.5   | 1.6       | 3.4     |
| 2AF         | 422.7    | 508.3  | 418.8  | 352.1  | 19.0  | 507.5  | 230.9  | 3036.0  | 350.0  | 331.4  | 34.5      | 60.8    |
| 2FA         | 4322.7   | 4631.4 | 3816.1 | 3208.3 | 174.2 | 4624.5 | 2105.0 | 27658.2 | 3189.2 | 3019.8 | 315.1     | 554.8   |
| 1234THQ     | 62.6     | 67.2   | 55.3   | 46.4   | 2.2   | 67.1   | 30.3   | 402.6   | 46.1   | 43.7   | 4.3       | 7.8     |
| 1tBI        | 62.8     | 70.3   | 57.8   | 48.6   | 2.3   | 70.2   | 31.7   | 421.6   | 48.3   | 45.7   | 4.4       | 8.1     |
| 4NP         | 103.1    | 115.8  | 80.9   | 54.2   | 1.8   | 108.0  | 47.6   | 708.2   | 47.4   | 61.0   | 7.1       | 9.8     |
| 2N135T      | 100.0    | 112.3  | 78.4   | 52.5   | 1.8   | 104.7  | 46.2   | 687.0   | 46.0   | 59.2   | 6.9       | 9.5     |
| 26D4NP      | 89.0     | 100.0  | 82.4   | 69.3   | 3.8   | 99.8   | 45.4   | 597.2   | 68.9   | 65.2   | 6.8       | 12.0    |
| 4M5NC       | 127.5    | 121.4  | 100.0  | 84.0   | 4.4   | 121.2  | 55.1   | 725.7   | 83.5   | 79.1   | 8.1       | 14.4    |
| 4NA         | 190.4    | 144.4  | 118.9  | 100.0  | 5.4   | 144.1  | 65.6   | 862.1   | 99.4   | 94.1   | 9.8       | 17.3    |
| 3NSA        | 5623.9   | 2659.7 | 2191.5 | 1842.4 | 100.0 | 2655.7 | 1208.8 | 15883.5 | 1831.5 | 1734.2 | 180.9     | 318.6   |
| P3C         | 95.5     | 100.2  | 82.6   | 69.4   | 4.0   | 100.0  | 45.6   | 597.0   | 69.0   | 65.4   | 7.0       | 12.2    |
| I2C         | 216.5    | 220.0  | 181.3  | 152.4  | 8.3   | 219.7  | 100.0  | 1314.0  | 151.5  | 143.5  | 15.0      | 26.4    |
| 3PAAE       | 14.6     | 16.9   | 13.9   | 11.7   | 0.8   | 16.8   | 7.7    | 100.0   | 11.6   | 11.0   | 1.3       | 2.1     |
| 2AP         | 217.5    | 145.2  | 119.7  | 100.6  | 5.4   | 145.0  | 66.0   | 867.4   | 100.0  | 94.7   | 9.9       | 17.4    |
| 4MSPAA      | 169.0    | 153.2  | 126.3  | 106.2  | 6.0   | 153.0  | 69.8   | 913.8   | 105.6  | 100.0  | 10.7      | 18.6    |
| 4A5M2MBSA   | 1444.2   | 1478.5 | 1218.1 | 1024.0 | 55.0  | 1476.3 | 671.6  | 8832.5  | 1017.9 | 963.8  | 100.0     | 176.6   |
| 3M4P1SA     | 1053.5   | 837.6  | 690.1  | 580.1  | 31.1  | 836.3  | 380.5  | 5003.8  | 576.6  | 546.0  | 56.6      | 100.0   |

(3) Lines 142-145: How did the authors choose the samples with "significant differences in MAE"? The criteria need to be detailed here.

[Response]

We gratefully acknowledge the reviewer's request for clarification regarding event selection criteria. To address this, we have now explicitly defined the selection criteria within Section 3.2: the two haze events (I and II) were systematically identified from all haze events meeting the PM<sub>2.5</sub> threshold ( $> 75 \mu\text{g m}^{-3}$ ). Among these haze events, Events I and II exhibited the maximal absolute difference in MAE<sub>365,HULIS</sub> values ( $\Delta = 0.50 \text{ m}^2 \text{ gC}^{-1}$ ). Event I represented the most serious pollution episode ( $159.6 \pm 53.8 \mu\text{g m}^{-3}$  of PM<sub>2.5</sub> and  $6.68 \mu\text{gC/m}^3$  of HULIS-C) with lower light absorption efficiency of HULIS ( $1.56 \text{ m}^2 \text{ gC}^{-1}$  of MAE<sub>365,HULIS</sub>), while Event II represented moderate pollution episode ( $83.7 \pm 36.4 \mu\text{g m}^{-3}$  of PM<sub>2.5</sub> and  $4.65 \mu\text{gC/m}^3$  of HULIS-C) but exhibited the highest MAE<sub>365,HULIS</sub> ( $2.06 \text{ m}^2 \text{ gC}^{-1}$ ) value.

[Revised]

Line 169-177: To investigate drivers of the high concentrations and variable light absorption efficiency of HULIS in this study, we selected two samples (Event I and II) among all haze events (PM<sub>2.5</sub> concentration  $> 75 \mu\text{g m}^{-3}$ ) that exhibited the maximal divergence in MAE<sub>365</sub> values. Event I had higher PM<sub>2.5</sub> ( $159.6 \pm 53.8 \mu\text{g m}^{-3}$ ) and HULIS-C ( $6.68 \mu\text{gC m}^{-3}$ ) but lower MAE<sub>365,HULIS</sub> ( $1.56 \text{ m}^2 \text{ gC}^{-1}$ ), while Event II had lower PM<sub>2.5</sub> ( $83.7 \pm 36.4 \mu\text{g m}^{-3}$ ) and HULIS-C ( $4.65 \mu\text{gC m}^{-3}$ ) but higher MAE<sub>365,HULIS</sub> ( $2.06 \text{ m}^2 \text{ gC}^{-1}$ ). These contrasting events were chosen for potential sources comparison from the perspective of molecular composition. Considering the lowest PM<sub>2.5</sub> and HULIS-C concentration, the sample on January 13 (PM<sub>2.5</sub> =  $14.1 \pm 11.9 \mu\text{g m}^{-3}$ , HULIS-C =  $0.97 \mu\text{gC m}^{-3}$ , MAE<sub>365,HULIS</sub> =  $1.28 \text{ m}^2 \text{ gC}^{-1}$ ) was selected to represent clean days. **Figure 2** exhibited the reconstructed MS spectra, the number, and concentration fraction of HULIS in both positive and negative modes.

(4) Lines 169-171: More evidence should be provided to propose the compounds in Cluster II from secondary formation. In addition, the contribution and proportion of OSs among Cluster II need to be detailed here.

[Response]

We sincerely appreciate the reviewer's guidance in strengthening the evidence for secondary formation pathways. In direct response, we have now quantified the dominance of organosulfates (OSs), which constitute  $84.7 \pm 6.5\%$  of compounds within Cluster II during the sampling period. This overwhelming predominance provides unambiguous molecular evidence for aqueous-phase derived compounds. Critically, this finding aligns mechanistically with elevated secondary inorganic ion concentrations ( $\text{NH}_4^+/\text{NO}_3^-/\text{SO}_4^{2-} = 16.66 - 41.56 \mu\text{g m}^{-3}$ ), enhanced relative humidity (83.1%), increased aerosol liquid water content (ALWC =  $95.9 \mu\text{g m}^{-3}$ ), and low pH (5.29) of Event I. These conditions collectively favor aqueous SOA formation pathways, as extensively documented in the cited literature (Brüggemann et al., 2017; Wach et al., 2020). Moreover, the abundance of Cluster II during the sampling period was significantly and positively correlated (Pearson's  $R = 0.8727$ ) with the total concentration of

secondary inorganic ions, further confirming that the compounds in Cluster II are mainly derived from secondary formation.

[Revised]

Line 200-211: All of CHOS compounds were characterized by ion fragment  $m/z$  96.9595 in the MS/MS spectra and were therefore identified as organosulfates (OSs). Cluster II was predominantly composed of OSs, accounting for  $84.7 \pm 6.5$  % of compounds within this cluster during the whole sampling period. Considering the OSs are typically formed by atmospheric aqueous reaction (Brüggemann et al., 2017; Pratt et al., 2013; Wach et al., 2020), the dominance of OSs in Cluster II strongly supports its secondary formation origin. The higher abundance of Cluster II in Event I indicated more intense secondary formation of HULIS during this event compared to Event II. This interpretation is corroborated by elevated concentrations of secondary inorganic ions (including  $\text{NH}_4^+$ ,  $\text{NO}_3^-$ , and  $\text{SO}_4^{2-}$ ,  $16.66 - 41.56$  vs  $4.30 - 7.30 \mu\text{g m}^{-3}$ ) and relative humidity ( $83.1 \pm 4.6\%$  vs  $61.9 \pm 14.0\%$ ) in Event I vs. II, as detailed in **Table S6**. As a result, the higher ALWC ( $95.9$  vs  $23.9 \mu\text{g m}^{-3}$ ) and lower pH value ( $5.29$  vs  $7.31$ ) in Event I in contrast to Event II facilitated the formation of OSs. Since the OSs studied here were primarily aliphatic sulfates (summarized as the molecular formulas of  $\text{C}_n\text{H}_{2n+2}\text{O}_{4-6}\text{S}$  and  $\text{C}_n\text{H}_{2n}\text{O}_{4-6}\text{S}$ , where  $10 \leq n \leq 18$ ), which belong to non-light-absorbing organic matter, this may cause the lower  $\text{MAE}_{365}$  value in Event I.

(5) lines 189-199: My major concern: Have the authors checked the variation of EC concentrations as a function of ambient temperature? I may suggest plotting the EC concentration in Figure 3. If low ambient temperature is accompanied by high EC concentration, the increasing of combustion emissions could be the primary reason for the pattern in Figure 3. If not, the author should state in detail and exclude this possibility.

[Response]

We sincerely appreciate the reviewer's critical perspective regarding combustion influences. To comprehensively address this concern, we analyzed the variation of elemental carbon (EC) concentration as a function of ambient temperature (as the following figure). This analysis confirms that EC concentrations do indeed tend to increase as ambient temperature decreases. However, the absolute level of EC is insufficient to determine whether the relative contribution of combustion emissions to the BrC burden has increased. An increase in EC could simply reflect more intensive emission from combustion sources, rather than a specific increase in the mass fraction of combustion-derived BrC. Therefore, we conducted a rigorous assessment of emission contributions using the combustion-derived organic carbon ratio ( $\text{OC}_{\text{com}}/\text{OC}_{\text{total}}$ ) rather than EC concentrations. The  $\text{OC}_{\text{com}}/\text{OC}_{\text{total}}$  directly represents the relative contribution of combustion sources to total organic aerosol (Cabada et al., 2004), making it the more appropriate metric for evaluating BrC content variations in Figure 3. As clearly demonstrated in Figure 3, this key metric exhibits no statistically significant temperature dependence, decisively excluding enhanced combustion inputs as the key driver for BrC accumulation at low temperatures.

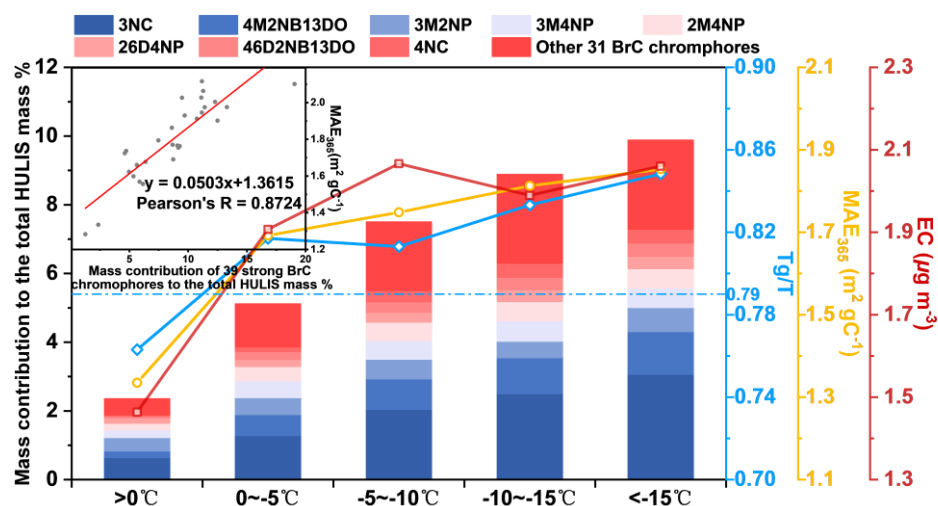

Figure. Temperature-dependent variations in mass fraction of 39 strong BrC chromophores,  $MAE_{365}$  value of HULIS,  $T_g/T$  ratio, and EC concentration, with correlation between chromophore mass fraction and HULIS  $MAE_{365}$ .

[Revised]

Line 224-238: **Figure 3** shows that the mass fraction of screened 39 strong BrC chromophores under different temperature ranges, as well as the negative variation patterns between the  $MAE_{365}$  and ambient temperature. In contrast, the  $OC_{com}/OC_{total}$  ratio shows no consistent temperature dependence, suggesting low temperature rather than combustion emission promote the accumulation of strong BrC species in the particles. We proposed two possible explanations: firstly, the low temperature may lead to a non-liquid phase state of ambient particles, potentially introducing kinetic limitation on the diffusion of reactive species from gas phase into particle bulk (Li and Shiraiwa, 2019)(Li and Shiraiwa, 2019). We utilized an established parameterization scheme (**Text S3**) to calculate the glass transition temperature ( $T_g$ ) of HULIS based on their molecular composition (Li et al., 2020)(Li et al., 2020). The results showed that the decrease in ambient temperature ( $T$ ) enhanced the  $T_g/T$  ratio, driving the phase transition of particles from liquid state ( $T_g/T = 0.76$ ) to semi-solid state ( $T_g/T > 0.79$ ). This may lead to the diffusion coefficients reduction of reactive species (Arangio et al., 2015; Gatzsche et al., 2017; Mikhailov et al., 2009; Shiraiwa et al., 2011; Virtanen et al., 2010), thereby slowing the degradation rate of BrC via hydroxyl radical oxidation or triplet excitation pathways in the atmosphere (Schnitzler et al., 2022; Schnitzler and Abbatt, 2018). These findings suggest that the non-liquid particle phase state, accompanied with the weak solar radiation during Changchun's winter (refer to **Figure 1B**), results in a less pronounced photochemical aging of BrC, thereby diminishing its photobleaching.



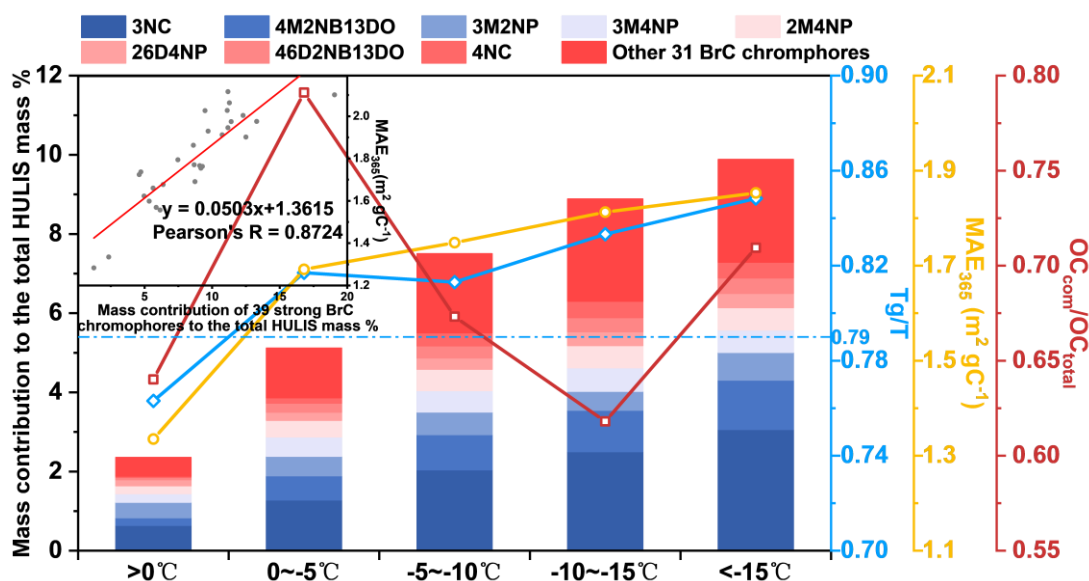

**Figure 3.** Temperature-dependent variations in mass fraction of 39 strong BrC chromophores,  $MAE_{365}$  value of HULIS,  $T_g/T$  ratio, and  $OC_{com}/OC_{total}$  ratio, with correlation between chromophore mass fraction and HULIS  $MAE_{365}$ . The blue dotted line represented the threshold of  $T_g/T$  between liquid and semi-solid state (Shiraiwa et al., 2017), and the abbreviations of 3NC, 4M2NB13DO, 3M2NP, 3M4NP, 2M4NP, 26D4NP, 46D2NB13DO, and 4NC represents 3-nitrocatechol, 4-methyl-2-nitrobenzene-1,3-diol, 3-methyl-2-nitrophenol, 3-methyl-4-nitrophenol, 2-methyl-4-nitrophenol, 2,6-dimethyl-4-nitrophenol, 4,6-dimethyl-2-nitrobenzene-1,3-diol, and 4-nitrocatechol, respectively.

(6) I suggest the authors to compare the quantification result of the BrC chromophores in Figure 3 with previous studies. Many nitro-aromatic compounds have been widely quantified in previous studies, and their contribution to organic aerosol concentrations and light absorption has been evaluated. The mass contribution of some nitro-aromatic compounds seems higher than previous studies. These should be explained, and the uncertainty of the quantification should be stated. In addition, the conversion from HULIS-C to HULIS mass should be described.

[Response]

We sincerely appreciate the reviewer's guidance regarding the contextualization of our BrC chromophore quantification. In response, we have now integrated comparative analysis with previous studies: the observed mass fraction of 39 strong BrC chromophores ( $8.67 \pm 3.68\%$  of HULIS mass) exceeds values reported for specific nitro-aromatic compounds (e.g., 7.5% for 12 NACs, (Frka et al., 2022)), which we attribute to inclusive detection of 39 nitrophenol derivatives and winter-specific accumulation under Changchun's extreme cold. Critically, despite their modest mass contribution, these chromophores contributed  $28.9 \pm 10.4\%$  of total light absorbance with  $MAE_{365} = 7.40 \pm 1.80 \text{ m}^2 \text{ gC}^{-1}$ , surpassing reported values for urban aerosols in Xi'an (10%) and Beijing (14%) (Huang et al., 2020). The HULIS mass conversion from HULIS-C employs a factor of 1.60 (Friman et al., 2023), and comprehensive uncertainty assessments of the semi-quantitative approach are detailed in **Text S2**.

[Revised]

Line 212-223: As above-mentioned, the temperature was down to  $-25^\circ\text{C}$ . This extreme cold

temperature critically alters the reactivity, phase partitioning, and aging kinetics of HULIS(He et al., 2006; Huang et al., 2006; Li and Shiraiwa, 2019; Shiraiwa et al., 2011). In total, 39 compounds were screened as strong BrC chromophores to investigate the effect of temperature on the BrC chromophores according to a partial least squares regression (PLS) model (detailed in **Text S3**). These compounds belong to nitrophenols or nitrophenol derivatives, which are marked in **Table S7**. The mass concentration of these 39 strong BrC chromophores was  $0.41 \pm 0.27 \mu\text{g m}^{-3}$  in average, accounting for  $8.67 \pm 3.68\%$  of the total HULIS mass (converted from [HULIS-C] using a factor of 1.6, (Friman et al., 2023)). This mass fraction exceeds values reported for 12 specific nitro-aromatic compounds in previous studies (about 7.5% of HULIS mass, (Frka et al., 2022)). Despite this modest mass contribution, these strong BrC chromophores contributed  $28.9 \pm 10.4\%$  of the light absorbance (detailed in **Text S4**), with an average  $\text{MAE}_{365}$  of  $7.40 \pm 1.80 \text{ m}^2 \text{ gC}^{-1}$  (**Figure S7**), higher than 10% and 14% light absorbance contribution of 18 chromophores in Xi'an and Beijing (Huang et al., 2020).

(7) *As some nitro-aromatic compounds have been quantified, I may suggest evaluating the light absorption contribution of some nitro-aromatic compounds with available standards. As the author stated, nitroaromatics are generally with high absorption capability. How much of the HULIS absorption is contributed by the quantified chromophores?*

[Response]

We sincerely appreciate the reviewer's insightful suggestion to evaluate the light absorption contribution of nitro-aromatic compounds using available standards. However, a direct experimental determination of their light absorption contribution within the complex HULIS matrix was fundamentally constrained by our analytical equipment. Our LC-MS system was not equipped with a diode array detector (DAD), which is essential for simultaneously quantifying the concentration of individual chromophores and measuring their UV-Vis absorption spectra within the HULIS mixture. Without DAD, we cannot experimentally obtain the compound-specific absorption required for calculating their individual contributions. To robustly address the question of chromophore contribution despite this limitation, we employed an alternative and powerful statistical approach: Partial Least Squares (PLS) regression. This method directly correlates molecular signals from mass spectrometry with bulk UV-Vis spectral data, thereby quantifying light absorption contributions ( $28.9 \pm 10.4\%$ ) through mathematical deconvolution.

(8) *Line 45: Change "elemental composition" to "molecular composition".*

[Response]

We sincerely appreciate the reviewer's precise suggestion regarding terminology refinement. We have deleted the "element composition" in the original text and changed the "elemental composition" in the full text to "molecular composition".

[Revised]

Line 40-51: As reactive components in the atmosphere, HULIS exhibit pronounced chemical

activity through their oxygenated functional groups, particularly prone to the oxidation by reactive oxygen radicals and gaseous oxidants (Hems et al., 2021; Huo et al., 2021; Qiu et al., 2024). Both laboratory simulations and field observations have demonstrated that these atmospheric aging processes significantly alter the light-absorption properties and environmental behaviors of HULIS (Hems and Abbatt, 2018; Qiu et al., 2024; Wang et al., 2022, 2019). Furthermore, significant efforts have been directed towards understanding the link between molecular composition and light absorption of HULIS. Studies have suggested that chromophores like nitroaromatics and oxygenated polycyclic aromatics are key contributors to the light absorption of HULIS (Kuang et al., 2023; Qin et al., 2022; Song et al., 2019; Zou et al., 2023). However, critical knowledge gaps persist regarding the molecular structures that dominate light absorption and, importantly how these molecules and their associated absorption properties evolve during atmospheric aging processes. This limits comprehension understanding of the atmospheric evolution process and radiative effect of HULIS.

Line 184-185: In the positive mode, Event I and II had similar molecular composition, both dominated by CHO compounds, followed by CHON, CHN, and others.

(9) Lines 116-120: Revise these sentences to be clear.

[Response]

We sincerely appreciate the reviewer's guidance on enhancing textual clarity. In response, we have comprehensively revised the passage to improve precision and flow.

[Revised]

Line 142-146: The average HULIS-C concentration was  $2.97 \pm 1.54 \mu\text{g m}^{-3}$ , accounting for 25.1% of total OC. The observed HULIS-C concentration was higher than those observed in winter of Europe ( $0.68 - 1.47 \mu\text{g m}^{-3}$ ) (Emmenegger et al., 2007; Voliotis et al., 2017), South America ( $0.20 - 1.30 \mu\text{g m}^{-3}$ ) (Serafeim et al., 2023), and Chinese other regions ( $1.96 - 2.38 \mu\text{g m}^{-3}$ ) (Lu et al., 2019; Ma et al., 2019; Zou et al., 2023), indicating the abundance of HULIS in Changchun.

(10) Line 125: Revise to be clear.

[Response]

We sincerely thank the reviewer for prompting enhanced methodological clarity. In response, we have revised the sentence to improve precision and flow.

[Revised]

Line 151-152: Non-targeted analysis of HULIS by UHPLC-HRMS/MS revealed 264 compounds at Schymanski's confidence levels above CL3 (Schymanski et al., 2014).

(11) Figure 2: It seems strange plotting the mass spectra in positive mode from large to low molecular weight. The figure caption also needs to be revised.

[Response]

We sincerely appreciate the reviewer's insightful feedback on Figure 2 presentation. In direct response, we have revised the caption to explicitly clarify the mass spectra: the unconventional layout displaying  $m/z$  values increasing from the center outward was intentionally preserved to keep the figure information concise. Correspondingly, the updated caption now precisely defines this ordering (" $m/z$  values increase from middle to both sides").

[Revised]

Line 179-183: **Figure 2.** Reconstructed mass spectra of identified HULIS compounds during Event I (A), Event II (B), and Clean day (C). Spectra are shown for positive ionization mode (left panels) and negative ionization mode (right panels).  $m/z$  values increase from middle to both sides in all spectra. The most abundant ions are labeled with their  $m/z$  values. The accompanying pie charts represent the molecular class distribution of the identified compounds: the inner/outer ring shows the relative abundance based on number/concentration of compounds.

(12) Line 165: Nitro-aromatics could be formed via secondary formation. Please correct.

[Response]

We sincerely appreciate the reviewer's suggestion regarding nitro-aromatics formation pathways. In response, we have revised the manuscript to explicitly acknowledge various sources of nitrophenols in Cluster I.

[Revised]

Line 194-198: Cluster I comprised a significant proportion of strong BrC species, such as nitrophenols (including 4-nitrophenol, 3-nitrocatechol, 4-nitro-1-naphthol, and etc., **Table S7**), mainly originating from primary emissions like biomass burning and coal combustion (Huang et al., 2023; Jiang et al., 2023; Lin et al., 2017; Wang et al., 2020) and secondary formation (Bolzacchini et al., 2001; Mayorga et al., 2021).

(13) Lines 166-167: Revise to be clear.

[Response]

We have revised the sentence to precisely articulate the relationship between Cluster I abundance and MAE<sub>365</sub> enhancement.

[Revised]

Line 198-199: Notably, the higher abundance of Cluster I in Event II compared to Event I likely contributed to the higher MAE<sub>365</sub> observed during Event II.

(14) lines 179-180: Revise to be clear.

[Response]

We sincerely appreciate the reviewer's guidance on enhancing scientific precision. In response to the comment "Revise to be clear", we have strengthened the statement to explicitly articulate the mechanistic impacts of extreme cold.

[Revised]

Line 212-214: As above-mentioned, the temperature was down to  $-25^{\circ}\text{C}$ . This extreme cold temperature critically alters the reactivity, phase partitioning, and aging kinetics of HULIS(He et al., 2006; Huang et al., 2006; Li and Shiraiwa, 2019; Shiraiwa et al., 2011).

(15) lines 187-188: *Revise to be clear.*

[Response]

We sincerely appreciate the reviewer's guidance on enhancing scientific clarity. The revised text now precisely articulates the key findings from Figure 3.

[Revised]

Line 224-227: **Figure 3** shows that the mass fraction of screened 39 strong BrC chromophores under different temperature ranges, as well as the negative variation patterns between the  $\text{MAE}_{365}$  and ambient temperature. In contrast, the  $\text{OC}_{\text{com}}/\text{OC}_{\text{total}}$  ratio shows no consistent temperature dependence, suggesting low temperature rather than combustion emission promote the accumulation of strong BrC species in the particles.

## Reference

- Allen, F., Greiner, R., and Wishart, D.: Competitive fragmentation modeling of ESI-MS/MS spectra for putative metabolite identification, *Metabolomics*, 11, 98–110, <https://doi.org/10.1007/S11306-014-0676-4>, 2015.
- Arangio, A. M., Slade, J. H., Berkemeier, T., Pöschl, U., Knopf, D. A., and Shiraiwa, M.: Multiphase chemical kinetics of OH radical uptake by molecular organic markers of biomass burning aerosols: Humidity and temperature dependence, surface reaction, and bulk diffusion, *Journal of Physical Chemistry A*, 119, 4533–4544, <https://doi.org/10.1021/JP510489Z>, 2015.
- Brüggemann, M., Poulain, L., Held, A., Stelzer, T., Zuth, C., Richters, S., Mutzel, A., Van Pinxteren, D., Iinuma, Y., Katkevica, S., Rabe, R., Herrmann, H., and Hoffmann, T.: Real-time detection of highly oxidized organosulfates and BSOA marker compounds during the F-BEACH 2014 field study, *Atmos Chem Phys*, 17, 1453–1469, <https://doi.org/10.5194/ACP-17-1453-2017>, 2017.
- Cabada, J. C., Pandis, S. N., Subramanian, R., Robinson, A. L., Polidori, A., and Turpin, B.: Estimating the Secondary Organic Aerosol Contribution to PM<sub>2.5</sub> Using the EC Tracer Method Special Issue of Aerosol Science and Technology on Findings from the Fine Particulate Matter Supersites Program, *Aerosol Science and Technology*, 38, 140–155, <https://doi.org/10.1080/02786820390229084>, 2004.
- Emmenegger, C., Reinhardt, A., Hueglin, C., Zenobi, R., and Kalberer, M.: Evaporative light scattering: A novel detection method for the quantitative analysis of humic-like substances in aerosols, *Environ Sci Technol*, 41, 2473–2478, <https://doi.org/10.1021/ES061095T>, 2007.
- Friman, M., Aurela, M., Saarnio, K., Teinilä, K., Kesti, J., Harni, S. D., Saarikoski, S., Hyvärinen, A., and Timonen, H.: Long-term characterization of organic and elemental carbon at three different background areas in northern Europe, *Atmos Environ*, 310, 119953, <https://doi.org/10.1016/J.ATMOSENV.2023.119953>, 2023.
- Frka, S., Šala, M., Brodnik, H., Štefane, B., Kroflič, A., and Grgić, I.: Seasonal variability of nitroaromatic compounds in ambient aerosols: Mass size distribution, possible sources and contribution to water-soluble brown carbon light absorption, *Chemosphere*, 299, 134381, <https://doi.org/10.1016/J.CHEMOSPHERE.2022.134381>, 2022.
- Gatzsche, K., Iinuma, Y., Tilgner, A., Mutzel, A., Berndt, T., and Wolke, R.: Kinetic modeling studies of SOA formation from  $\alpha$ -pinene ozonolysis, *Atmos Chem Phys*, 17, 13187–13211, <https://doi.org/10.5194/ACP-17-13187-2017>, 2017.
- He, L. Y., Hu, M., Huang, X. F., Zhang, Y. H., and Tang, X. Y.: Seasonal pollution characteristics of organic compounds in atmospheric fine particles in Beijing, *Science of The Total Environment*, 359, 167–176, <https://doi.org/10.1016/J.SCITOTENV.2005.05.044>, 2006.
- Hems, R. F. and Abbatt, J. P. D.: Aqueous Phase Photo-oxidation of Brown Carbon Nitrophenols: Reaction Kinetics, Mechanism, and Evolution of Light Absorption, *ACS Earth Space Chem*, 2, 225–234, <https://doi.org/10.1021/ACSEARTHSPACECHEM.7B00123>, 2018.
- Hems, R. F., Schnitzler, E. G., Liu-Kang, C., Cappa, C. D., and Abbatt, J. P. D.: Aging of Atmospheric Brown Carbon Aerosol, *ACS Earth Space Chem*, 5, 722–748, <https://doi.org/10.1021/ACSEARTHSPACECHEM.0C00346>, 2021.
- Huang, R. J., Yang, L., Shen, J., Yuan, W., Gong, Y., Guo, J., Cao, W., Duan, J., Ni, H., Zhu, C., Dai, W., Li, Y., Chen, Y., Chen, Q., Wu, Y., Zhang, R., Dusek, U., O'Dowd, C., and Hoffmann, T.: Water-Insoluble Organics Dominate Brown Carbon in Wintertime Urban Aerosol of China: Chemical Characteristics and Optical Properties, *Environ Sci Technol*, 54, 7836–7847, <https://doi.org/10.1021/acs.est.0c01149>, 2020.
- Huang, S., Yang, X., Xu, H., Zeng, Y., Li, D., Sun, J., Ho, S. S. H., Zhang, Y., Cao, J., and Shen, Z.:

Insights into the nitroaromatic compounds, formation, and light absorption contributing emissions from various geological maturity coals, *Science of The Total Environment*, 870, 162033, <https://doi.org/10.1016/J.SCITOTENV.2023.162033>, 2023.

Huang, X. F., He, L. Y., Hu, M., and Zhang, Y. H.: Annual variation of particulate organic compounds in PM<sub>2.5</sub> in the urban atmosphere of Beijing, *Atmos Environ*, 40, 2449–2458, <https://doi.org/10.1016/J.ATMOSENV.2005.12.039>, 2006.

Huo, Y., Guo, Z., Li, Q., Wu, D., Ding, X., Liu, A., Huang, D., Qiu, G., Wu, M., Zhao, Z., Sun, H., Song, W., Li, X., Chen, Y., Wu, T., and Chen, J.: Chemical Fingerprinting of HULIS in Particulate Matters Emitted from Residential Coal and Biomass Combustion, *Environ Sci Technol*, 55, 3593–3603, <https://doi.org/10.1021/acs.est.0c08518>, 2021.

Jiang, H., Cai, J., Feng, X., Chen, Y., Wang, L., Jiang, B., Liao, Y., Li, J., Zhang, G., Mu, Y., and Chen, J.: Aqueous-Phase Reactions of Anthropogenic Emissions Lead to the High Chemodiversity of Atmospheric Nitrogen-Containing Compounds during the Haze Event, *Environ Sci Technol*, 57, 16500–16511, <https://doi.org/10.1021/ACS.EST.3C06648>, 2023.

Kind, T. and Fiehn, O.: Seven Golden Rules for heuristic filtering of molecular formulas obtained by accurate mass spectrometry, *BMC Bioinformatics*, 8, <https://doi.org/10.1186/1471-2105-8-105>, 2007.

Kuang, Y., Shang, J., Sheng, M., Shi, X., Zhu, J., and Qiu, X.: Molecular Composition of Beijing PM<sub>2.5</sub> Brown Carbon Revealed by an Untargeted Approach Based on Gas Chromatography and Time-of-Flight Mass Spectrometry, *Environ Sci Technol*, 57, 909–919, <https://doi.org/10.1021/acs.est.2c05918>, 2023.

Li, Y. and Shiraiwa, M.: Timescales of secondary organic aerosols to reach equilibrium at various temperatures and relative humidities, *Atmos Chem Phys*, 19, 5959–5971, <https://doi.org/10.5194/ACP-19-5959-2019>, 2019.

Li, Y., A. Day, D., Stark, H., L. Jimenez, J., and Shiraiwa, M.: Predictions of the glass transition temperature and viscosity of organic aerosols from volatility distributions, *Atmos Chem Phys*, 20, 8103–8122, <https://doi.org/10.5194/ACP-20-8103-2020>, 2020.

Lin, P., Bluvshstein, N., Rudich, Y., Nizkorodov, S. A., Laskin, J., and Laskin, A.: Molecular Chemistry of Atmospheric Brown Carbon Inferred from a Nationwide Biomass Burning Event, *Environ Sci Technol*, 51, 11561–11570, <https://doi.org/10.1021/ACS.EST.7B02276>, 2017.

Lu, S., Win, M. S., Zeng, J., Yao, C., Zhao, M., Xiu, G., Lin, Y., Xie, T., Dai, Y., Rao, L., Zhang, L., Yonemochi, S., and Wang, Q.: A characterization of HULIS-C and the oxidative potential of HULIS and HULIS-Fe(II) mixture in PM<sub>2.5</sub> during hazy and non-hazy days in Shanghai, *Atmos Environ*, 219, 117058, <https://doi.org/10.1016/J.ATMOSENV.2019.117058>, 2019.

Ma, J., Ungeheuer, F., Zheng, F., Du, W., Wang, Y., Cai, J., Zhou, Y., Yan, C., Liu, Y., Kulmala, M., Daellenbach, K. R., and Vogel, A. L.: Nontarget Screening Exhibits a Seasonal Cycle of PM<sub>2.5</sub> Organic Aerosol Composition in Beijing, *Environ Sci Technol*, 56, 7017–7028, <https://doi.org/10.1021/acs.est.1c06905>, 2022.

Ma, Y., Cheng, Y., Qiu, X., Cao, G., Kuang, B., Yu, J. Z., and Hu, D.: Optical properties, source apportionment and redox activity of humic-like substances (HULIS) in airborne fine particulates in Hong Kong, *Environmental Pollution*, 255, 113087, <https://doi.org/10.1016/J.ENVPOL.2019.113087>, 2019.

Mikhailov, E., Vlasenko, S., Martin, S. T., Koop, T., and Pöschl, U.: Amorphous and crystalline aerosol particles interacting with water vapor: Conceptual framework and experimental evidence for restructuring, phase transitions and kinetic limitations, *Atmos Chem Phys*, 9, 9491–9522, <https://doi.org/10.5194/ACP-9-9491-2009>, 2009.

Nguyen, Q. T., Christensen, M. K., Cozzi, F., Zare, A., Hansen, A. M. K., Kristensen, K., Tulinius, T. E.,

Madsen, H. H., Christensen, J. H., Brandt, J., Massling, A., Nøjgaard, J. K., and Glasius, M.: Understanding the anthropogenic influence on formation of biogenic secondary organic aerosols in Denmark via analysis of organosulfates and related oxidation products, *Atmos Chem Phys*, 14, 8961–8981, <https://doi.org/10.5194/ACP-14-8961-2014>, 2014a.

Nguyen, Q. T., Christensen, M. K., Cozzi, F., Zare, A., Hansen, A. M. K., Kristensen, K., Tulinius, T. E., Madsen, H. H., Christensen, J. H., Brandt, J., Massling, A., Nøjgaard, J. K., and Glasius, M.: Understanding the anthropogenic influence on formation of biogenic secondary organic aerosols in Denmark via analysis of organosulfates and related oxidation products, *Atmos Chem Phys*, 14, 8961–8981, <https://doi.org/10.5194/ACP-14-8961-2014>, 2014b.

Nozière, B., Kalberer, M., Claeys, M., Allan, J., D’Anna, B., Decesari, S., Finessi, E., Glasius, M., Grgić, I., Hamilton, J. F., Hoffmann, T., Iinuma, Y., Jaoui, M., Kahnt, A., Kampf, C. J., Kourtchev, I., Maenhaut, W., Marsden, N., Saarikoski, S., Schnelle-Kreis, J., Surratt, J. D., Szidat, S., Szmigielski, R., and Wisthaler, A.: The Molecular Identification of Organic Compounds in the Atmosphere: State of the Art and Challenges, *Chem Rev*, 115, 3919–3983, <https://doi.org/10.1021/CR5003485>, 2015.

Pratt, K. A., Fiddler, M. N., Shepson, P. B., Carlton, A. G., and Surratt, J. D.: Organosulfates in cloud water above the Ozarks’ isoprene source region, *Atmos Environ*, 77, 231–238, <https://doi.org/10.1016/J.ATMOSENV.2013.05.011>, 2013.

Qin, J., Zhang, L., Qin, Y., Shi, S., Li, J., Gao, Y., Tan, J., and Wang, X.: PH-Dependent Chemical Transformations of Humic-Like Substances and Further Cognitions Revealed by Optical Methods, *Environ Sci Technol*, 56, 7578–7587, <https://doi.org/10.1021/ACS.EST.1C07729>, 2022.

Qiu, Y., Qiu, T., Wu, Z., Liu, Y., Fang, W., Man, R., Liu, Y., Wang, J., Meng, X., Chen, J., Liang, D., Guo, S., and Hu, M.: Observational Evidence of Brown Carbon Photobleaching in Urban Atmosphere at Molecular Level, *Environ Sci Technol Lett*, <https://doi.org/10.1021/ACS.ESTLETT.4C00647>, 2024.

Schnitzler, E. G. and Abbatt, J. P. D.: Heterogeneous OH oxidation of secondary brown carbon aerosol, *Atmos Chem Phys*, 18, 14539–14553, <https://doi.org/10.5194/ACP-18-14539-2018>, 2018.

Schnitzler, E. G., Gerrebos, N. G. A., Carter, T. S., Huang, Y., Heald, C. L., Bertram, A. K., and Abbatt, J. P. D.: Rate of atmospheric brown carbon whitening governed by environmental conditions, *Proc Natl Acad Sci U S A*, 119, e2205610119, <https://doi.org/10.1073/PNAS.2205610119>, 2022.

Schymanski, E. L., Jeon, J., Gulde, R., Fenner, K., Ruff, M., Singer, H. P., and Hollender, J.: Identifying small molecules via high resolution mass spectrometry: Communicating confidence, <https://doi.org/10.1021/es5002105>, 2014.

Serafeim, E., Basis, A., Kouras, A., Farias, C. N., Yera, A. B., Pereira, G. M., Samara, C., and de Castro Vasconcellos, P.: Oxidative potential of ambient PM<sub>2.5</sub> from São Paulo, Brazil: Variations, associations with chemical components and source apportionment, *Atmos Environ*, 298, 119593, <https://doi.org/10.1016/J.ATMOSENV.2023.119593>, 2023.

Shiraiwa, M., Ammann, M., Koop, T., and Pöschl, U.: Gas uptake and chemical aging of semisolid organic aerosol particles, *Proc Natl Acad Sci U S A*, 108, 11003–11008, <https://doi.org/10.1073/PNAS.1103045108>, 2011.

Shiraiwa, M., Li, Y., Tsimpidi, A. P., Karydis, V. A., Berkemeier, T., Pandis, S. N., Lelieveld, J., Koop, T., and Pöschl, U.: Global distribution of particle phase state in atmospheric secondary organic aerosols, *Nature Communications* 2017 8:1, 8, 1–7, <https://doi.org/10.1038/ncomms15002>, 2017.

Song, J., Li, M., Fan, X., Zou, C., Zhu, M., Jiang, B., Yu, Z., Jia, W., Liao, Y., and Peng, P.: Molecular Characterization of Water- And Methanol-Soluble Organic Compounds Emitted from Residential Coal Combustion Using Ultrahigh-Resolution Electrospray Ionization Fourier Transform Ion Cyclotron



Resonance Mass Spectrometry, *Environ Sci Technol*, 53, 13607–13617, <https://doi.org/10.1021/ACS.EST.9B04331>, 2019.

Virtanen, A., Joutsensaari, J., Koop, T., Kannosto, J., Yli-Pirilä, P., Leskinen, J., Mäkelä, J. M., Holopainen, J. K., Pöschl, U., Kulmala, M., Worsnop, D. R., and Laaksonen, A.: An amorphous solid state of biogenic secondary organic aerosol particles, *Nature* 2010 467:7317, 467, 824–827, <https://doi.org/10.1038/nature09455>, 2010.

Voliotis, A., Prokeš, R., Lammel, G., and Samara, C.: New insights on humic-like substances associated with wintertime urban aerosols from central and southern Europe: Size-resolved chemical characterization and optical properties, *Atmos Environ*, 166, 286–299, <https://doi.org/10.1016/J.ATMOENV.2017.07.024>, 2017.

Wach, P., Spólnik, G., Surratt, J. D., Blaziak, K., Rudzinski, K. J., Lin, Y. H., Maenhaut, W., Danikiewicz, W., Claeys, M., and Szmigielski, R.: Structural Characterization of Lactone-Containing MW 212 Organosulfates Originating from Isoprene Oxidation in Ambient Fine Aerosol, *Environ Sci Technol*, 54, 1415–1424, <https://doi.org/10.1021/ACS.EST.9B06190>, 2020.

Wang, D., Shen, Z., Zhang, Q., Lei, Y., Zhang, T., Huang, S., Sun, J., Xu, H., and Cao, J.: Winter brown carbon over six of China's megacities: Light absorption, molecular characterization, and improved source apportionment revealed by multilayer perceptron neural network, *Atmos Chem Phys*, 22, 14893–14904, <https://doi.org/10.5194/ACP-22-14893-2022>, 2022.

Wang, H., Gao, Y., Wang, S., Wu, X., Liu, Y., Li, X., Huang, D., Lou, S., Wu, Z., Guo, S., Jing, S., Li, Y., Huang, C., Tyndall, G. S., Orlando, J. J., and Zhang, X.: Atmospheric Processing of Nitrophenols and Nitrocresols From Biomass Burning Emissions, *Journal of Geophysical Research: Atmospheres*, 125, e2020JD033401, <https://doi.org/10.1029/2020JD033401>, 2020.

Wang, Y., Hu, M., Lin, P., Tan, T., Li, M., Xu, N., Zheng, J., Du, Z., Qin, Y., Wu, Y., Lu, S., Song, Y., Wu, Z., Guo, S., Zeng, L., Huang, X., and He, L.: Enhancement in Particulate Organic Nitrogen and Light Absorption of Humic-Like Substances over Tibetan Plateau Due to Long-Range Transported Biomass Burning Emissions, *Environ Sci Technol*, 53, 14222–14232, <https://doi.org/10.1021/acs.est.9b06152>, 2019.

Zou, C., Cao, T., Li, M., Song, J., Jiang, B., Jia, W., Li, J., Ding, X., Yu, Z., Zhang, G., and Peng, P.: Measurement report: Changes in light absorption and molecular composition of water-soluble humic-like substances during a winter haze bloom-decay process in Guangzhou, China, *Atmos Chem Phys*, 23, 963–979, <https://doi.org/10.5194/ACP-23-963-2023>, 2023.
